# Supplementary material for: Yb,Nd,Er-doped upconversion nanoparticles: 980 nm versus 808 nm excitation
Source: Royal Society of Chemistry journal article supplement (doi:10.1039/c9nr03127h), 2019-01-01
Supplement: c9nr03127h1.pdf [file c9nr03127h1.pdf]

## Supporting Information

### Yb,Nd,Er-Doped Upconversion Nanoparticles: 980 nm versus 808 nm Excitation

Lisa M. Wiesholler<sup>a,†</sup>, Florian Frenzel<sup>b,c,†</sup>, Bettina Grauel<sup>b,c</sup>, Christian Würth<sup>b</sup>, Ute Resch-Genger<sup>b</sup> and Thomas Hirsch<sup>a</sup>

<sup>a</sup> University of Regensburg, Institute of Analytical Chemistry, Chemo- and Biosensors, 93040 Regensburg, Germany. E-mail: thomas.hirsch@ur.de

<sup>b</sup> BAM Federal Institute for Materials Research and Testing, Division 1.10 Biophotonics, 12489 Berlin, Germany, E-mail: ute.resch@bam.de

<sup>c</sup> WG Nanooptics, Institute for Physics, Humboldt-University Berlin, Newtonstraße 15, 12489 Berlin, Germany.

† These authors contributed equally.

#### Table of Contents

|                                                                                                                       |    |
|-----------------------------------------------------------------------------------------------------------------------|----|
| 1. Synthesis of Upconversion Nanoparticles .....                                                                      | 2  |
| 2. ICP-Characterization of all Particle Systems .....                                                                 | 4  |
| 3. Characterization of Core-Shell NaYF <sub>4</sub> :Yb,Er@NaYF <sub>4</sub> :5-15%Yb,5-15%Nd Particles .....         | 5  |
| 4. Surface Modification of Upconversion Nanoparticles.....                                                            | 6  |
| 5. Luminescence Properties of (Yb@Yb,Nd) <sup>as</sup> and (Yb@Yb,Nd) <sup>is</sup> Particles Excited at 980 nm ..... | 7  |
| 6. Characterization of the Different Particle Systems used to compare 808 nm Excitation to 980 nm Excitation.....     | 8  |
| 7. Absorption Cross-Sections Values for Nd <sup>3+</sup> - and Yb <sup>3+</sup> -ions .....                           | 12 |
| 8. Quantum Yield Measurements .....                                                                                   | 14 |
| 9. Calculation of the Relative Brightness.....                                                                        | 18 |
| 10. Calculation of Intensity Change as a Function of Penetration Depth into Water .....                               | 20 |
| 11. Studies of the Penetration Depth in Phantom Tissue .....                                                          | 22 |
| 12. References.....                                                                                                   | 23 |

## 1. Synthesis of Upconversion Nanoparticles

### Synthesis of hexagonal core particles NaYF<sub>4</sub>:20%Yb,2%Er

For the synthesis of 1 mmol  $\beta$ -NaYF<sub>4</sub>:20%Yb,2%Er particles, the lanthanide chlorides were dissolved in methanol (5 mL) in the corresponding molar ratios. Oleic acid (8 mL) and 1-octadecene (15 mL) was added into a 50 mL three necked round bottom flask under nitrogen flow. This solution was heated to 160 °C and vacuum was applied for 30 min unless it appeared clear. This solution was cooled to room temperature and 4.00 mmol NH<sub>4</sub>F and 2.5 mmol NaOH in 10 mL methanol were added and then the suspension was kept at 120 °C for 30 min before heating to reflux (ca. 320 °C). The heating-time was controlled by the appearance of upconversion luminescence in the synthesis flask upon continuous excitation with a 980 nm laser module (200 mW, cw). When the upconversion luminescence can be identified by the bare eye, the solution is kept at reflux for additional 8 min. To achieve a complete transformation of the nanocrystals from the  $\alpha$ - to the  $\beta$ -form and to receive monodisperse particles, a heating time of 15 min turned out to be best for the 25 nm sized particles. To obtain particles with bigger diameters the heating steps and the reflux time was adapted. The particles were precipitated by the addition of excess of ethanol and collected by centrifugation at 1,000 g for 5 min. The precipitate was washed with chloroform/ethanol (1:10 v/v) two times and five times with cyclohexane/acetone (1:10 v/v) by repeated redispersion-precipitation-centrifugation cycles. In the end, for removing aggregates, the particles were dispersed in 10 mL cyclohexane, centrifuged at 1,000 g for 3 min and the supernatant was collected.

### Synthesis of cubic NaYF<sub>4</sub>:5%Yb,5%Nd; NaYF<sub>4</sub>:10%Yb,10%Nd; NaYF<sub>4</sub>:15%Yb,15%Nd; NaYF<sub>4</sub>:10%Yb and NaYF<sub>4</sub>

Cubic shell-precursor materials were synthesized via a synthesis protocol almost identical to the synthesis of hexagonal NaYF<sub>4</sub>:Yb,Er particles, by using the respective molar ratios of the lanthanide chlorides. The suspension was not heating to reflux but kept for 30 min at 240 °C to receive the cubic crystal lattice. Moreover, the purification of the particles was performed as described above.

### Synthesis of core-shell NaYF<sub>4</sub>:20%Yb,2%Er@NaYF<sub>4</sub>:5-15%Yb,5-15%Nd; NaYF<sub>4</sub>:20%Yb,2%Er@NaYF<sub>4</sub>:10%Yb; (Yb@Yb,Nd)<sup>is</sup>; (Yb@Yb)<sup>is</sup>; (Yb)<sup>is2</sup>; (Yb)<sup>is5</sup>

The core particles (NaYF<sub>4</sub>:20%Yb,2%Er) together with the respective shell precursors (NaYF<sub>4</sub>:10%Yb,10%Nd, or NaYF<sub>4</sub>:10%Yb, or NaYF<sub>4</sub>) were filled in different ratios according to the desired thickness of the shell into 50 mL three necked round bottom flasks and were kept under nitrogen flow. For the 4 nm shell a ratio core to precursor material of 1 to 3, while for the 2 nm shell a ratio of 1 to 1.5 was used. Per 1 mmol total content of core NaYF<sub>4</sub>-particles, 5 mL oleic acid and 5 mL 1-octadecene were added. After this the  $\beta$ -NaYF<sub>4</sub>-particles and the precursors were separately heated to 100 °C before vacuum was applied for 1 h unless a clear solution was obtained. After this the  $\beta$ -NaYF<sub>4</sub>-particles were heated to reflux and the shell precursor was kept under nitrogen flow at 100 °C. Every 10 minutes a small portion (approx. 1 - 3 mL) of the shell precursor was added to the mixture. When the precursor material was consumed, the solution was kept for another 10 min at reflux. The precipitation and

purification of the core-shell nanoparticles was performed according to the protocol described for redispersion-precipitation cycles of  $\text{NaYF}_4:20\%\text{Yb},2\%\text{Er}$ .

## 2. ICP-Characterization of all Particle Systems

**Table S1.** ICP-MS-data showing the composition of all particle systems used in this study.

<sup>1</sup>These values are calculated.

| particle system                                                                         |                          | core               |                     |                     | active-shell       |                     |                     | inert-shell        | total <sup>1</sup> |                     |                     |                     |
|-----------------------------------------------------------------------------------------|--------------------------|--------------------|---------------------|---------------------|--------------------|---------------------|---------------------|--------------------|--------------------|---------------------|---------------------|---------------------|
|                                                                                         | acronym                  | Y <sup>3+</sup> /% | Yb <sup>3+</sup> /% | Er <sup>3+</sup> /% | Y <sup>3+</sup> /% | Yb <sup>3+</sup> /% | Nd <sup>3+</sup> /% | Y <sup>3+</sup> /% | Y <sup>3+</sup> /% | Yb <sup>3+</sup> /% | Nd <sup>3+</sup> /% | Er <sup>3+</sup> /% |
| $\beta$ -NaYF <sub>4</sub> :20%Yb,2%Er@NaYF <sub>4</sub> :5%Yb,5%Nd@NaYF <sub>4</sub>   | -                        | 77.6<br>±<br>0.17  | 20.6<br>±<br>0.21   | 1.8<br>±<br>0.04    | 89.1<br>±<br>0.17  | 5.9<br>±<br>0.18    | 4.9<br>±<br>0.01    | -                  | 74.1<br>±<br>0.17  | 23.2<br>±<br>0.12   | 2.0<br>±<br>0.11    | 0.7<br>±<br>0.01    |
| $\beta$ -NaYF <sub>4</sub> :20%Yb,2%Er@NaYF <sub>4</sub> :10%Yb,10%Nd@NaYF <sub>4</sub> | (Yb@Yb,Nd) <sup>is</sup> | 77.6<br>±<br>0.17  | 20.6<br>±<br>0.21   | 1.8<br>±<br>0.04    | 80.2<br>±<br>0.29  | 10.0<br>±<br>0.16   | 9.8<br>±<br>0.09    | 99.8<br>±<br>0.20  | 78.5<br>±<br>0.50  | 14.0<br>±<br>0.14   | 6.5<br>±<br>0.05    | 1.0<br>±<br>0.02    |
| $\beta$ -NaYF <sub>4</sub> :20%Yb,2%Er@NaYF <sub>4</sub> :15%Yb,15%Nd@NaYF <sub>4</sub> | -                        | 77.6<br>±<br>0.17  | 20.6<br>±<br>0.21   | 1.8<br>±<br>0.04    | 69.3<br>±<br>0.10  | 15.1<br>±<br>0.13   | 15.6<br>±<br>0.10   | -                  | 68.6<br>±<br>0.15  | 18.8<br>±<br>0.07   | 12.0<br>±<br>0.04   | 0.6<br>±<br>0.02    |
| $\beta$ -NaYF <sub>4</sub> :20%Yb,2%Er@NaYF <sub>4</sub> :10%Yb@NaYF <sub>4</sub>       | (Yb@Yb) <sup>is</sup>    | 77.6<br>±<br>0.17  | 20.6<br>±<br>0.21   | 1.8<br>±<br>0.04    | 89.1<br>±<br>0.75  | 10.9<br>±<br>0.11   | -                   | 98.7<br>±<br>0.13  | 84.2<br>±<br>0.51  | 14.8<br>±<br>0.06   | -                   | 1.0<br>±<br>0.00    |
| $\beta$ -NaYF <sub>4</sub> :20%Yb,2%Er@NaYF <sub>4</sub>                                | (Yb) <sup>is5</sup>      | 77.6<br>±<br>0.17  | 20.6<br>±<br>0.21   | 1.8<br>±<br>0.04    | -                  | -                   | -                   | 99.0<br>±<br>0.10  | 89.8<br>±<br>0.8   | 9.2<br>±<br>0.54    | -                   | 1.0<br>±<br>0.01    |
| $\beta$ -NaYF <sub>4</sub> :20%Yb,2%Er@NaYF <sub>4</sub>                                | (Yb) <sup>is2</sup>      | 77.6<br>±<br>0.17  | 20.6<br>±<br>0.21   | 1.8<br>±<br>0.04    | 78.4<br>±<br>0.57  | 19.4<br>±<br>0.32   | 2.2<br>±<br>0.00    | 100.0<br>±<br>0.00 | 80.4<br>±<br>0.32  | 17.5<br>±<br>0.23   | -                   | 2.1<br>±<br>0.01    |
| $\alpha$ -NaYF <sub>4</sub> :5%Yb,5%Nd                                                  | -                        |                    |                     |                     | 90.5<br>±<br>0.17  | 5<br>±<br>0.02      | 4.5<br>±<br>0.01    |                    |                    |                     |                     |                     |
| $\alpha$ -NaYF <sub>4</sub> :10%Yb,10%Nd                                                | -                        |                    |                     |                     | 79.1<br>±<br>0.14  | 9.9<br>±<br>0.07    | 10<br>±<br>0.07     |                    |                    |                     |                     |                     |
| $\alpha$ -NaYF <sub>4</sub> :15%Yb,15%Nd                                                | -                        |                    |                     |                     | 70 ±<br>0.10       | 15 ±<br>0.13        | 15 ±<br>0.10        |                    |                    |                     |                     |                     |
| $\alpha$ -NaYF <sub>4</sub> :10%Yb                                                      |                          |                    |                     |                     | 90.1<br>±<br>0.20  | 9.9<br>±<br>0.08    |                     |                    |                    |                     |                     |                     |
| $\alpha$ -NaYF <sub>4</sub> :20%Yb,2%Er                                                 | -                        | 78.1<br>±<br>0.15  | 19.9<br>±<br>0.10   | 2.0<br>±<br>0.03    | 77.6<br>±<br>0.17  |                     |                     |                    |                    |                     |                     |                     |
| $\alpha$ NaYF <sub>4</sub>                                                              | -                        |                    |                     |                     |                    |                     |                     | 100<br>±<br>0.4    |                    |                     |                     |                     |

### 3. Characterization of Core-Shell $\text{NaYF}_4:\text{Yb,Er}@ \text{NaYF}_4:5\text{-}15\%\text{Yb},5\text{-}15\%\text{Nd}$ Particles

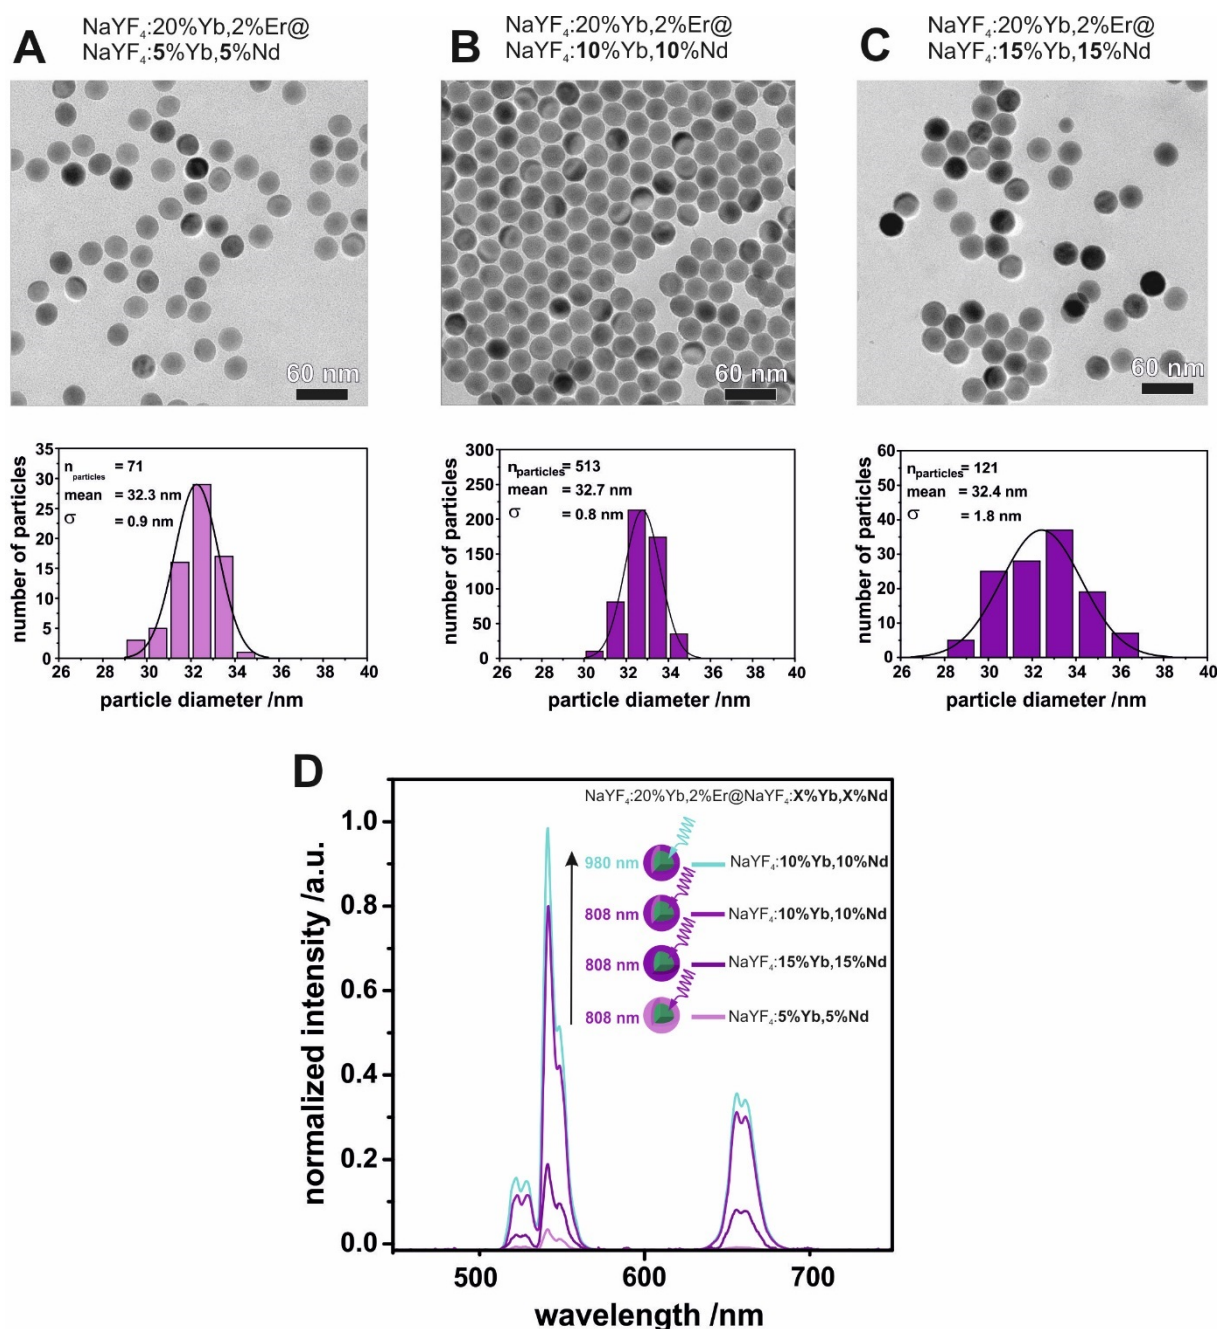

**Figure S1.** TEM images and size distribution of core shell particles  $\text{NaYF}_4:20\%\text{Yb},2\%\text{Er}@ \text{NaYF}_4:5\%\text{Yb},5\%\text{Nd}$  (A, light purple),  $\text{NaYF}_4:20\%\text{Yb},2\%\text{Er}@ \text{NaYF}_4:10\%\text{Yb},10\%\text{Nd}$  (B, purple) and  $\text{NaYF}_4:20\%\text{Yb},2\%\text{Er}@ \text{NaYF}_4:15\%\text{Yb},15\%\text{Nd}$  (C, dark purple). Luminescence spectra of core-shell particles  $\text{NaYF}_4:20\%\text{Yb},2\%\text{Er}@ \text{NaYF}_4:5\%\text{Yb},5\%\text{Nd}$  (light purple),  $\text{NaYF}_4:20\%\text{Yb},2\%\text{Er}@ \text{NaYF}_4:10\%\text{Yb},10\%\text{Nd}$  (purple) and  $\text{NaYF}_4:20\%\text{Yb},2\%\text{Er}@ \text{NaYF}_4:15\%\text{Yb},15\%\text{Nd}$  (dark purple) excited by 808 nm and core shell particles  $\text{NaYF}_4:20\%\text{Yb},2\%\text{Er}@ \text{NaYF}_4:10\%\text{Yb}$  (turquoise) excited by 980 nm (D). All particles are dispersed in cyclohexane. The spectra were acquired under same laser excitation power of  $13 \text{ W}\cdot\text{cm}^{-2}$  and normalized to the particle concentration evaluated by ICP-MS. For the comparison the emission at 540 nm of the  $\text{NaYF}_4:20\%\text{Yb},2\%\text{Er}@ \text{NaYF}_4:10\%\text{Yb},10\%\text{Nd}$  (turquoise) excited at 980 nm was set to one, and the spectra recorded at 808 nm excitation were corrected by the same factor.

#### 4. Surface Modification of Upconversion Nanoparticles

The ligand exchange strategy with nitrosyl tetrafluoroborate is based on a method described by Wiesholler *et al.*<sup>1</sup>. In a two-phase system consisting of equal volumes of cyclohexane and DMF the nanoparticles were dispersed.  $\text{NOBF}_4$  (1 mg per 1 mg UCNPs) was added and the dispersion was stirred at slightly elevated temperature ( $\sim 40^\circ\text{C}$ ) for 10 min. During this time the oleate-capped hydrophobic UCNPs were transferred from the cyclohexane phase into the DMF phase. This phase transfer can be easily monitored by control of the upconversion luminescence via excitation with a 980 nm laser module (200 mW, cw). Surface modification is complete, when only the DMF phase exhibits upconversion luminescence. The clear upper cyclohexane phase was discarded, and the particles were precipitated by excess of chloroform. The suspension is centrifuged at 1,000 g for 5 min. The jellylike precipitate is washed twice with chloroform. Finally, the  $\text{BF}_4^-$ -stabilized particles are dispersed in DMF, and aggregates were removed by centrifugation at 1,000 g for 3 min. Poly(acrylic acid) ( $M_w \sim 2,100$ ) was dissolved in water ( $2\text{ mg}\cdot\text{mL}^{-1}$ ) and added to the  $\text{BF}_4^-$ -stabilized nanoparticles dispersed in DMF. The solution was stirred and kept at a moderate temperature of  $40^\circ\text{C}$  for 15 min. Afterwards the dispersion was centrifuged (13,600 g for 20 min) and washed twice with water. Finally, the supernatants were collected after centrifugation at 1,000 g for 3 min.

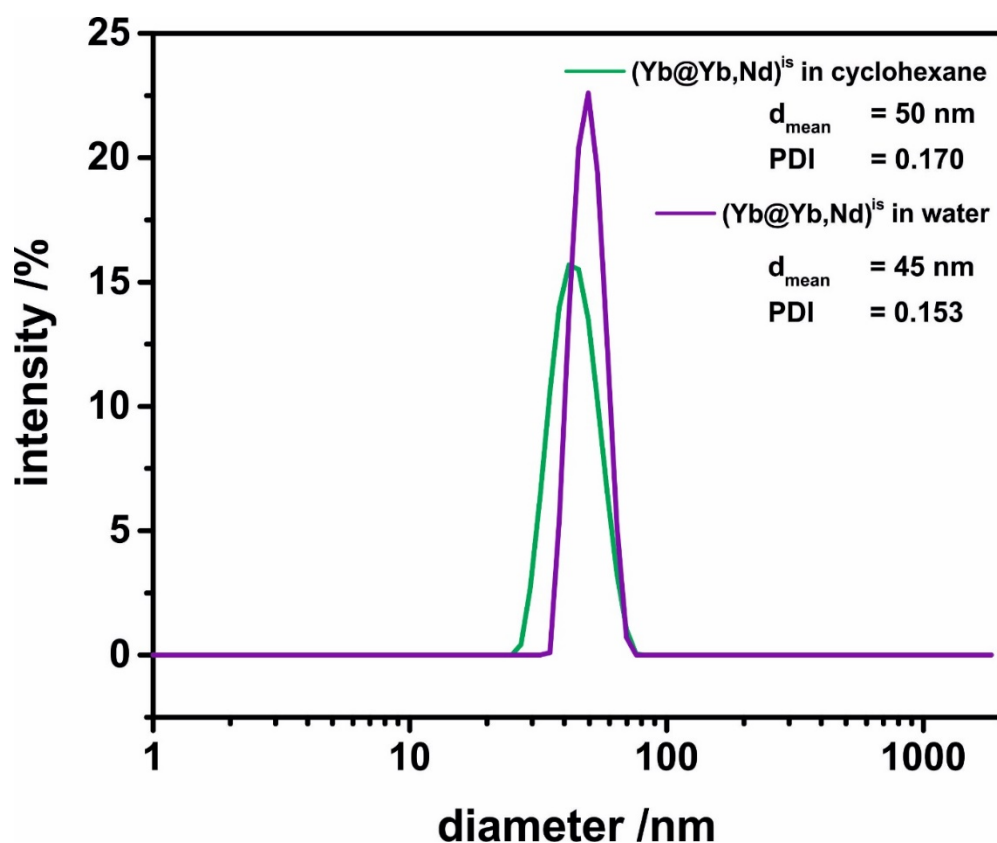

**Figure S2.** Colloidal stability and monodispersity of  $\text{NaYF}_4\text{:}20\%\text{Yb},2\%\text{Er}@ \text{NaYF}_4\text{:}10\%\text{Yb},10\%\text{Nd}@ \text{NaYF}_4$  particles before (blue) and after surface modification with poly(acrylic acid) was confirmed by a solvodynamic diameter of 45 nm with a polydispersity index of 0.153 measured by dynamic light scattering of the particle dispersion in water ( $1\text{ mg}\cdot\text{L}^{-1}$ ). No agglomeration of the particles in dispersion over 3 months can be observed.

5. Luminescence Properties of  $(Yb@Yb,Nd)^{as}$  and  $(Yb@Yb,Nd)^{is}$  Particles Excited at 980 nm

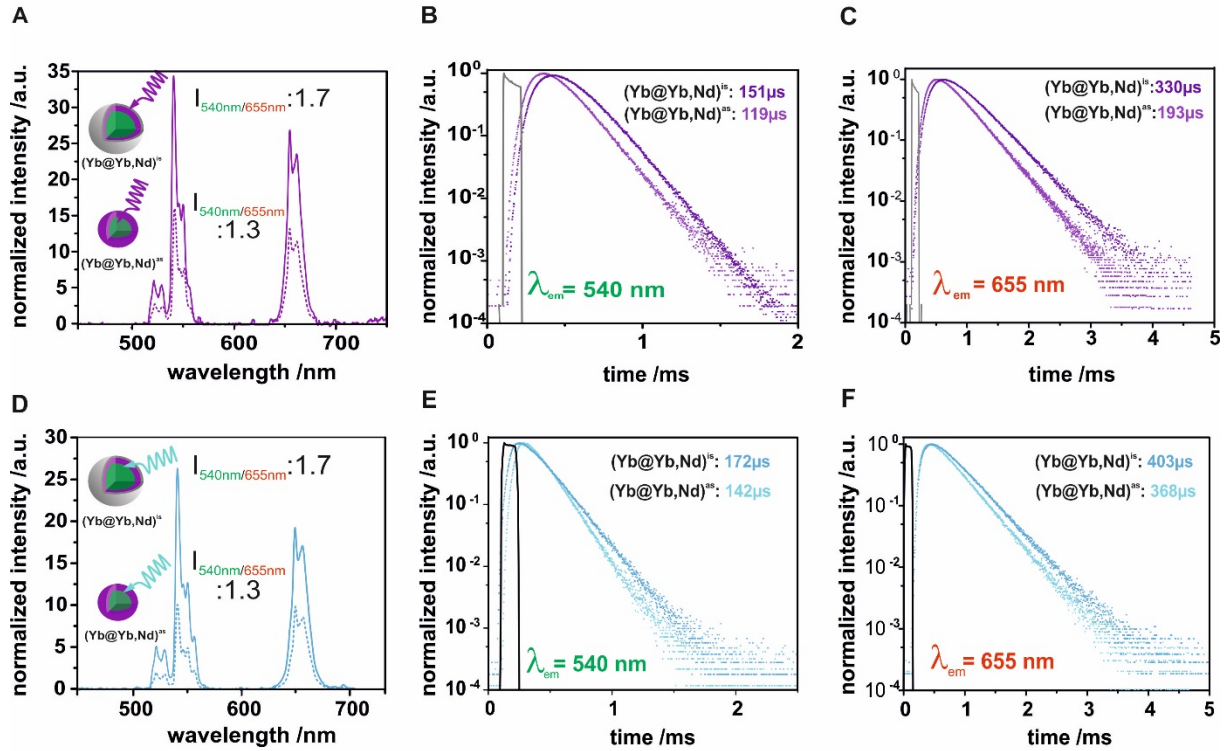

**Figure S3.** Luminescence spectra (A) and decay times for the green (540 nm) (B) and red (655 nm) (C) emission of core-shell particles  $NaYF_4:20\%Yb,2\%Er@NaYF_4:10\%Yb,10\%Nd$   $(Yb@Yb,Nd)^{as}$  (dashed line and bright purple) and core-shell-shell particles  $NaYF_4:20\%Yb,2\%Er@NaYF_4:10\%Yb,10\%Nd@NaYF_4$   $(Yb@Yb,Nd)^{is}$  (solid line and dark purple) in aqueous solutions, excited at 808 nm (purple). The luminescence spectra (D) for the 980 nm (turquoise) excitation and decay times for the green (540 nm) (E) and red (655 nm) (F) emission of core-shell particles  $NaYF_4:20\%Yb,2\%Er@NaYF_4:10\%Yb,10\%Nd$   $(Yb@Yb,Nd)$  (dashed line and bright turquoise) and core-shell-shell particles  $NaYF_4:20\%Yb,2\%Er@NaYF_4:10\%Yb,10\%Nd@NaYF_4$   $(Yb@Yb,Nd)^{is}$  (solid line and dark turquoise) in aqueous solutions, excited at 980 nm (turquoise).

## 6. Characterization of the Different Particle Systems used to compare 808 nm Excitation to 980 nm Excitation

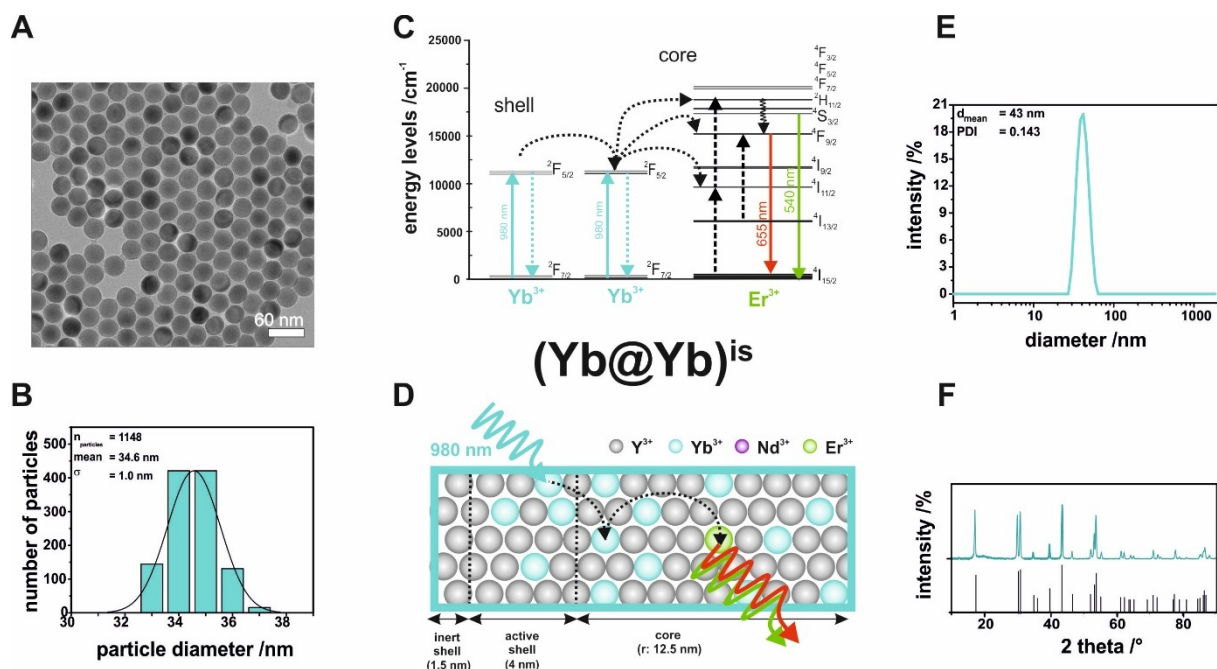

**Figure S4.** TEM-image **(A)** and corresponding size distribution **(B)** of  $\text{NaYF}_4:20\%\text{Yb},2\%\text{Er}@ \text{NaYF}_4:10\%\text{Yb}@ \text{NaYF}_4$  particles  $(\text{Yb}@\text{Yb})^{15}$ . The diameter averaged from 1,148 particles is  $34.6 \pm 1.0$  nm. Possible energy transfer processes **(C)** and lateral distribution of the lanthanide ions ( $\text{Y}^{3+}$ ,  $\text{Yb}^{3+}$ ,  $\text{Nd}^{3+}$  and  $\text{Er}^{3+}$ ) in the different layers (core, active and inert shell) **(D)** are symbolized. The near monodispersity of the particles in aqueous solutions was confirmed by a solvodynamic diameter of 43 nm with a polydispersity index of 0.143 measured by dynamic light scattering of the particle dispersion in water ( $1 \text{ mg} \cdot \text{L}^{-1}$ ). No agglomeration of the particles over 3 months in dispersion can be observed **(E)**. The diffraction patterns reveal a hexagonal crystal phase as the reflexes of the nanocrystals match the standard reference pattern of  $\beta\text{-NaYF}_4$  (ICDD PDF #16-334) (black) **(F)**.



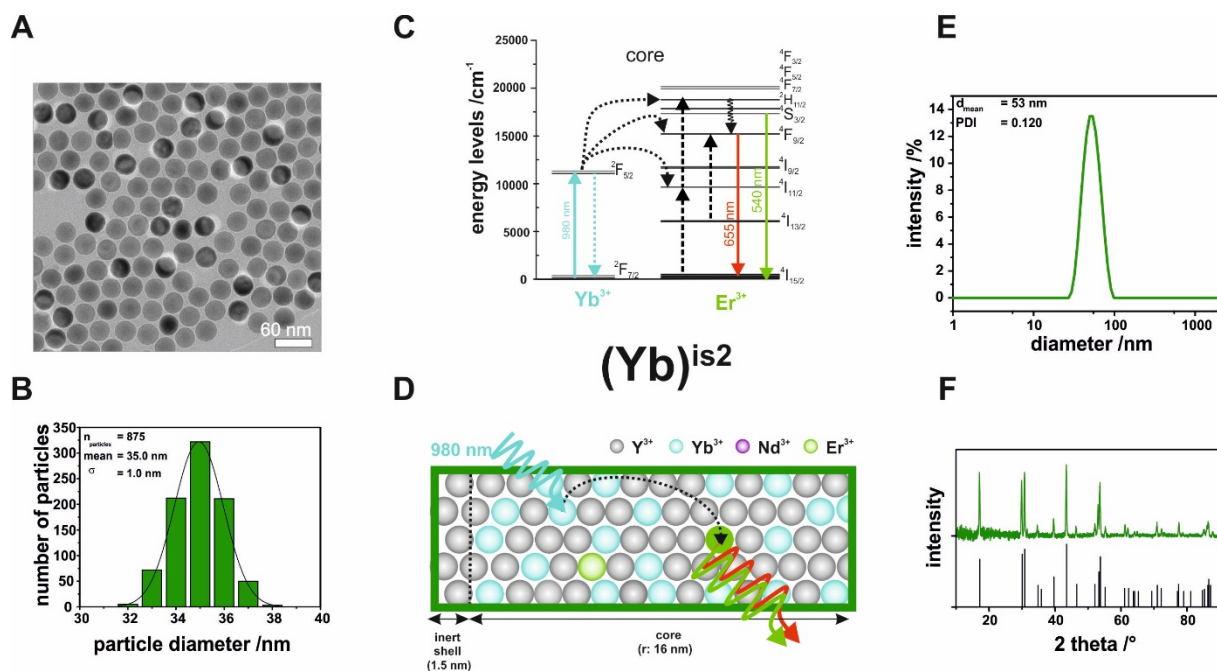

**Figure S5.** TEM-image (A) and corresponding size distribution (B) of  $\text{NaYF}_4(20\%\text{Yb}, 2\%\text{Er})@ \text{NaYF}_4$  particles ((Yb)<sup>is2</sup>). The diameter averaged from 875 particles is  $35.0 \pm 1.0$  nm. Possible energy transfer processes (C) and lateral distribution of the lanthanide ions ( $\text{Y}^{3+}$ ,  $\text{Yb}^{3+}$ ,  $\text{Nd}^{3+}$  and  $\text{Er}^{3+}$ ) in the different layers (core, active and inert shell) (D) are symbolized. The near monodispersity of the particles in aqueous solutions was confirmed by a solvodynamic diameter of 53 nm with a polydispersity index of 0.120 measured by dynamic light scattering of the particle dispersion in water ( $1 \text{ mg} \cdot \text{L}^{-1}$ ). No agglomeration of the particles in dispersion over 3 months can be observed (E). The diffraction patterns reveal a hexagonal crystal phase as the reflexes of the nanocrystals match the standard reference pattern of  $\beta\text{-NaYF}_4$  (ICDD PDF #16-334) (black) (F).

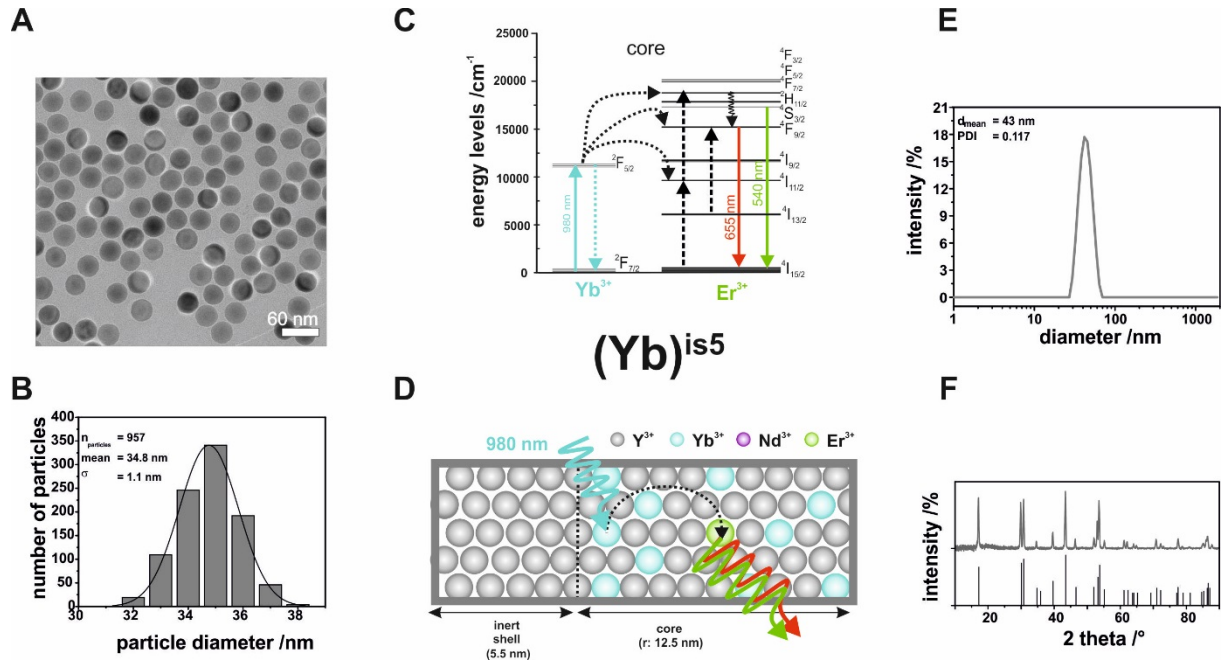

**Figure S6.** TEM-image **(A)** and corresponding size distribution **(B)** of NaYF<sub>4</sub>(20%Yb,2%Er)@NaYF<sub>4</sub> particles ((Yb)<sup>is5</sup>). The diameter averaged from 957 particles is  $34.8 \pm 1.1$  nm. Possible energy transfer processes **(C)** and lateral distribution of the lanthanide ions (Y<sup>3+</sup>, Yb<sup>3+</sup>, Nd<sup>3+</sup> and Er<sup>3+</sup>) in the different layers (core, active and inert shell) **(D)** are symbolized. The near monodispersity of the particles in aqueous solutions was confirmed by a solvodynamic diameter of 43 nm with a polydispersity index of 0.117 measured by dynamic light scattering of the particle dispersion in water (1 mg·L<sup>-1</sup>). No agglomeration of the particles over 3 months in dispersion can be observed **(E)**. The diffraction patterns reveal hexagonal crystal phases as the reflexes of the nanocrystals match the standard reference pattern of β-NaYF<sub>4</sub> (ICDD PDF #16-334) (black) **(F)**.

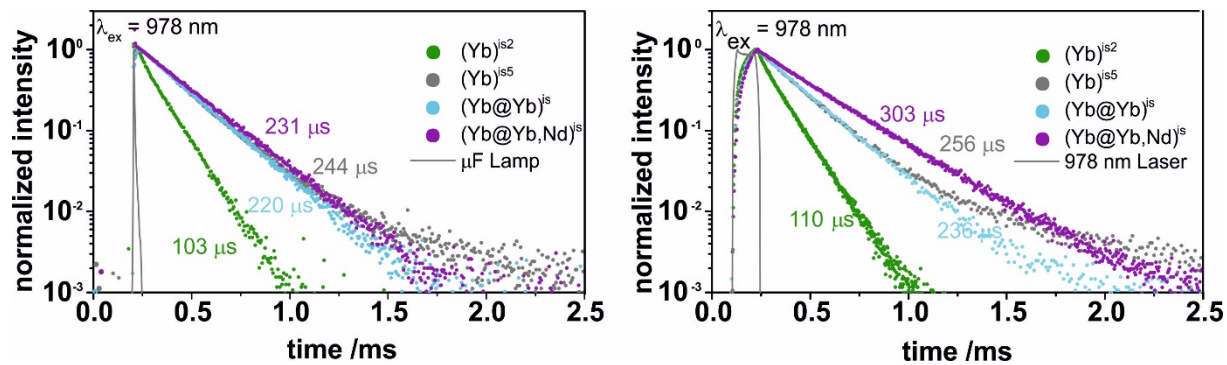

**Figure S7.** Decay times for the Yb emission **(A)** of particles  $NaYF_4:20\%Yb,2\%Er@NaYF_4:10\%Yb,10\%Nd$  ( $(Yb@Yb,Nd)^{is}$ , green),  $NaYF_4:20\%Yb,2\%Er@NaYF_4:10\%Yb@NaYF_4$  ( $(Yb@Yb)^{is}$ , blue), and  $NaYF_4(20\%Yb,2\%Er)@NaYF_4$  particles ( $(Yb)^{is2}$ , black and  $(Yb)^{is5}$ , red) in aqueous solution under Yb excitation (978 nm) using a  $\mu$ Flash lamp as low-power density excitation light source and **(B)** an 8 W laser diode as high-power density light source. The intensity-weighted mean lifetimes are indicated in the graphs in the respective colors.

## 7. Absorption Cross-Sections Values for Nd<sup>3+</sup>- and Yb<sup>3+</sup>-ions

**Table S2.** Composition of absorption cross section values for Nd<sup>3+</sup> and Yb<sup>3+</sup> ions found in the literature for different host materials and excitations wavelengths.

| Ln <sup>3+</sup> | host material                  | $\lambda_{exc}$ /nm | absorption cross-section /<br>cm <sup>2</sup> | Ref.      |
|------------------|--------------------------------|---------------------|-----------------------------------------------|-----------|
| Nd <sup>3+</sup> | LaF <sub>3</sub>               | 790                 | $2.5 \cdot 10^{-20}$                          | 2         |
| Nd <sup>3+</sup> | (Gd,Y)VO <sub>4</sub>          | 808                 | $2 \cdot 10^{-19}$                            | 3         |
| Nd <sup>3+</sup> | Nd <sup>3+</sup>               | 800                 | $1.2 \cdot 10^{-19}$                          | 4         |
| Nd <sup>3+</sup> | Sc <sub>2</sub> O <sub>3</sub> | 825                 | $7.2 \cdot 10^{-20}$                          | 5         |
| Nd <sup>3+</sup> | YAG*                           | 808                 | $1.2 \cdot 10^{-19}$                          | 6         |
| Nd <sup>3+</sup> | NaYF <sub>4</sub>              | 808                 | $10^{-14}$ (calculated per NP)                | 7         |
| Nd <sup>3+</sup> | -                              | ~800                | ~ $10^{-19}$                                  | 8         |
| Nd <sup>3+</sup> | NaYF <sub>4</sub>              | 805                 | $4.9 \cdot 10^{-20}$                          | this work |
| Nd <sup>3+</sup> | NaYF <sub>4</sub>              | 794                 | $1.3 \cdot 10^{-19}$                          | this work |
| Yb <sup>3+</sup> | YAlO <sub>3</sub>              | 980                 | $2.1 \cdot 10^{-20}$                          | 5         |
| Yb <sup>3+</sup> | YAG*                           | 980                 | $2.5 \cdot 10^{-20}$                          | 9         |
| Yb <sup>3+</sup> | Al <sub>2</sub> O <sub>3</sub> | 980                 | $1.2 \cdot 10^{-20}$                          | 6         |
| Yb <sup>3+</sup> | -                              | ~980                | $10^{-20}$                                    | 8         |
| Yb <sup>3+</sup> | NaYF <sub>4</sub>              | 978                 | $1.4 \cdot 10^{-20}$                          | this work |
|                  |                                | 976                 | $1.8 \cdot 10^{-20}$                          | this work |

\*Yttrium aluminium garnet

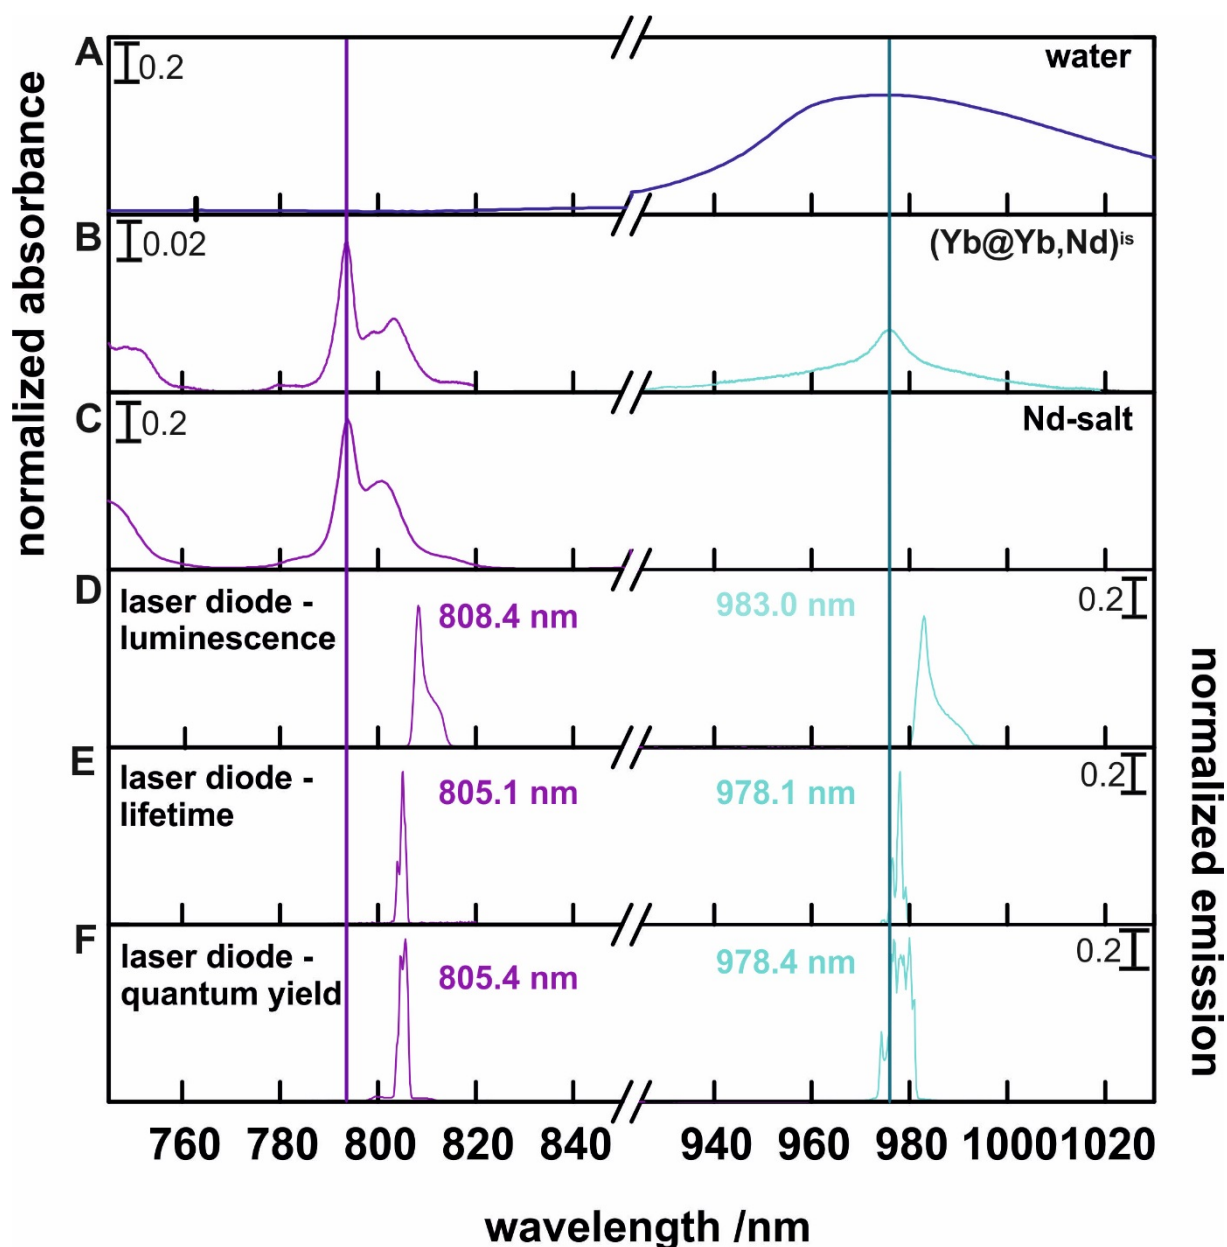

**Figure S8.** Absorbance spectra of water (A), normalized particle cross-section of  $NaYF_4:20\%Yb,2\%Er@NaYF_4:10\%Yb,10\%Nd@NaYF_4$  particles in cyclohexane (B) and normalized absorbance spectra of  $NdCl_3$  salt ( $0.1 \text{ mol}\cdot\text{L}^{-1}$ ) (C). The normalized emission of the laser modules 808 nm (purple) and 980 nm (turquoise) was also measured for the luminescence spectra (D), lifetimes (E) and quantum yield measurements (F). The exact values (real Nd- and Yb-excitation) for the laser excitation are listed in the Figure. The lines in purple and turquoise indicate the ideal excitation wavelengths.

## 8. Quantum Yield Measurements

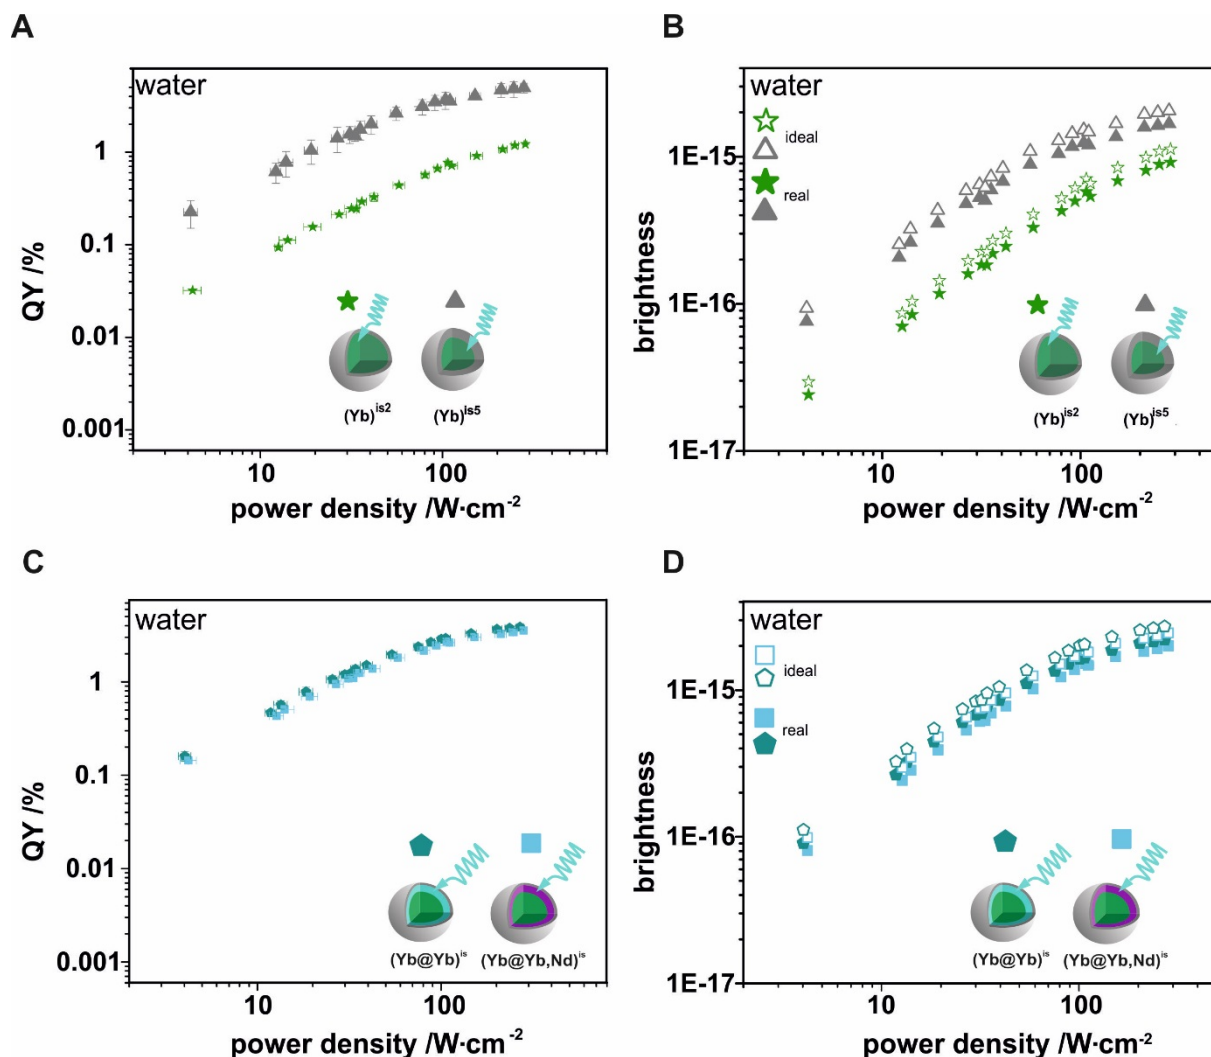

**Figure S9.** Power density dependent absolute quantum yields of  $\text{NaYF}_4\text{:}20\%\text{Yb},2\%\text{ErNaYF}_4$   $(\text{Yb})^{\text{is}2}$  (green) and  $(\text{Yb})^{\text{is}5}$  (grey) particles dispersed in water at 978 nm excitation **(A)**. Particle brightness in dependence of laser power of  $(\text{Yb})^{\text{is}2}$  (green) and  $(\text{Yb})^{\text{is}5}$  (grey) particles measured by excitation at 978 nm (real) in aqueous solution and calculated for an ideal excitation at 976 nm **(B)**. For the particles  $\text{NaYF}_4\text{:}20\%\text{Yb},2\%\text{Er@NaYF}_4\text{:}10\%\text{Yb@NaYF}_4$   $(\text{Yb@Yb})^{\text{is}}$  and  $\text{NaYF}_4\text{:}20\%\text{Yb},2\%\text{Er@NaYF}_4\text{:}10\%\text{Yb},10\%\text{Nd@NaYF}_4$   $(\text{Yb@Nd,Yb})^{\text{is}}$  dispersed in water also power density dependent absolute quantum yield by excitation at 978 nm **(C)** and brightness calculations **(D)** in dependence of laser power were performed. For the brightness, the ideal values for an excitation at 976 nm were also calculated. It is shown that Nd doping has no significant negative impact on Yb-excitation.

**Table S3.** Quantum Yield Data of the NaYF<sub>4</sub>:20%Yb,2%Er@NaYF<sub>4</sub>:10%Yb@NaYF<sub>4</sub> (Yb@Yb)<sup>is</sup> and NaYF<sub>4</sub>:20%Yb,2%Er@NaYF<sub>4</sub>:10%Yb,10%Nd@NaYF<sub>4</sub> (Yb@Nd,Yb)<sup>is</sup> samples in water, under 978 nm and 805 nm excitation (used in Figures 4B and 5A).

| (Yb@Yb) <sup>is</sup> , 978 nm       |                     | (Yb@Yb,Nd) <sup>is</sup> , 978 nm    |                     | (Yb@Yb,Nd) <sup>is</sup> , 805 nm    |                     |
|--------------------------------------|---------------------|--------------------------------------|---------------------|--------------------------------------|---------------------|
| power density<br>/W·cm <sup>-2</sup> | quantum yield<br>/% | power density<br>/W·cm <sup>-2</sup> | quantum yield<br>/% | power density<br>/W·cm <sup>-2</sup> | quantum yield<br>/% |
| 4.15 ± 0.36                          | 0.225 ± 0.074       | 4.22 ± 0.43                          | 0.1474 ± 0.0031     | 34.91 ± 0.37                         | 0.0211 ± 0.0020     |
| 12.16 ± 0.79                         | 0.61 ± 0.15         | 12.77 ± 1.14                         | 0.444 ± 0.014       | 49.14 ± 0.42                         | 0.0297 ± 0.0013     |
| 13.9 ± 1.3                           | 0.78 ± 0.24         | 14.1 ± 1.8                           | 0.520 ± 0.025       | 57.31 ± 0.56                         | 0.03214 ± 0.00017   |
| 19.0 ± 1.6                           | 1.04 ± 0.31         | 19.4 ± 2.0                           | 0.71651 ± 0.00013   | 60.13 ± 0.76                         | 0.03612 ± 0.00021   |
| 26.5 ± 2.0                           | 1.42 ± 0.43         | 27.0 ± 2.5                           | 0.9790 ± 0.0022     | 66.69 ± 0.84                         | 0.04042 ± 0.00017   |
| 31.0 ± 2.2                           | 1.56 ± 0.32         | 31.5 ± 2.8                           | 1.12 ± 0.04         | 74.63 ± 0.72                         | 0.04375 ± 0.00081   |
| 33.1 ± 1.8                           | 1.49 ± 0.19         | 33.5 ± 1.4                           | 1.137 ± 0.042       | 103.6 ± 1.2                          | 0.0614 ± 0.0022     |
| 35.3 ± 2.3                           | 1.76 ± 0.41         | 36.0 ± 2.4                           | 1.2772 ± 0.0029     | 146.3 ± 1.5                          | 0.0872 ± 0.0022     |
| 40.6 ± 3.1                           | 2.01 ± 0.46         | 42.7 ± 4.2                           | 1.426 ± 0.045       | 170.5 ± 2.6                          | 0.1036 ± 0.0029     |
| 55.8 ± 3.9                           | 2.63 ± 0.44         | 58.6 ± 5.1                           | 1.87 ± 0.11         | 194.63 ± 0.61                        | 0.12027 ± 0.00095   |
| 77.6 ± 4.4                           | 3.10 ± 0.59         | 81.2 ± 6.2                           | 2.25 ± 0.22         | 198.33 ± 0.21                        | 0.1281 ± 0.0019     |
| 90.9 ± 5.1                           | 3.47 ± 0.65         | 95.1 ± 4.8                           | 2.531 ± 0.061       | 270.87 ± 0.25                        | 0.17017 ± 0.00011   |
| 103.8 ± 5.5                          | 3.68 ± 0.78         | 108.4 ± 2.5                          | 2.785 ± 0.055       | 382.0437 ± 0.0056                    | 0.2481 ± 0.0013     |
| 110.1 ± 8.0                          | 3.55 ± 0.23         | 111.9 ± 7.5                          | 2.71 ± 0.21         | 447.2 ± 1.2                          | 0.2766 ± 0.0015     |
| 151 ± 11                             | 4.05 ± 0.31         | 154 ± 13                             | 3.11 ± 0.17         | 522.1 ± 1.2                          | 0.36586 ± 0.00086   |
| 210 ± 14                             | 4.69 ± 0.79         | 214 ± 16                             | 3.368 ± 0.045       |                                      |                     |
| 246 ± 13                             | 4.83 ± 0.95         | 249 ± 13                             | 3.51 ± 0.10         |                                      |                     |
| 280 ± 13                             | 4.95 ± 0.60         | 284.6 ± 4.7                          | 3.67 ± 0.20         |                                      |                     |

**Table S4.** Brightness Data of the NaYF<sub>4</sub>:20%Yb,2%Er@NaYF<sub>4</sub>:10%Yb,10%Nd@NaYF<sub>4</sub> (Yb@Nd,Yb)<sup>is</sup> sample in water, under 978 nm and 805 nm excitation (real, obtained in measurement) and under 976 nm and 785 nm excitation (ideal, calculated) (used in Figure 4C).

| power density<br>/W·cm <sup>-2</sup> | brightness<br>/10 <sup>-17</sup> cm <sup>2</sup><br>978 nm, real | brightness<br>/10 <sup>-17</sup> cm <sup>2</sup><br>976 nm, ideal | power density<br>/W·cm <sup>-2</sup> | brightness<br>10 <sup>-17</sup> cm <sup>2</sup><br>805 nm, real | brightness<br>10 <sup>-17</sup> cm <sup>2</sup><br>794 nm, ideal |
|--------------------------------------|------------------------------------------------------------------|-------------------------------------------------------------------|--------------------------------------|-----------------------------------------------------------------|------------------------------------------------------------------|
| 4.22 ± 0.43                          | 8.0                                                              | 9.9                                                               | 34.91 ± 0.37                         | 1.46                                                            | 3.71                                                             |
| 12.8 ± 1.1                           | 24.2                                                             | 29.7                                                              | 49.14 ± 0.42                         | 2.06                                                            | 5.22                                                             |
| 14.1 ± 1.8                           | 28.4                                                             | 34.8                                                              | 57.31 ± 0.56                         | 2.23                                                            | 5.66                                                             |
| 19.4 ± 2                             | 39.1                                                             | 48.0                                                              | 60.13 ± 0.76                         | 2.51                                                            | 6.36                                                             |
| 27.0 ± 2.5                           | 53.4                                                             | 65.5                                                              | 66.69 ± 0.84                         | 2.81                                                            | 7.11                                                             |
| 31.5 ± 2.8                           | 61.1                                                             | 75                                                                | 74.63 ± 0.72                         | 3.04                                                            | 7.7                                                              |
| 33.5 ± 1.4                           | 62.0                                                             | 76                                                                | 103.6 ± 1.2                          | 4.26                                                            | 10.8                                                             |
| 36.0 ± 2.4                           | 69.7                                                             | 85                                                                | 146.3 ± 1.5                          | 6.05                                                            | 15.3                                                             |
| 42.7 ± 4.2                           | 78                                                               | 95                                                                | 170.5 ± 2.6                          | 7.2                                                             | 18.2                                                             |
| 58.6 ± 5.1                           | 102                                                              | 125                                                               | 194.63 ± 0.61                        | 8.3                                                             | 21.2                                                             |
| 81.2 ± 6.2                           | 123                                                              | 151                                                               | 198.33 ± 0.21                        | 8.9                                                             | 22.5                                                             |
| 95.1 ± 4.8                           | 138                                                              | 169                                                               | 270.87 ± 0.25                        | 11.8                                                            | 30.0                                                             |
| 108.4 ± 2.5                          | 152                                                              | 186                                                               | 382.0437 ± 0.0056                    | 17.2                                                            | 43.7                                                             |
| 111.9 ± 7.5                          | 148                                                              | 181                                                               | 447.2 ± 1.2                          | 19.2                                                            | 48.7                                                             |
| 154 ± 13                             | 170                                                              | 208                                                               | 522.1 ± 1.2                          | 25.4                                                            | 64.4                                                             |
| 214 ± 16                             | 184                                                              | 225                                                               |                                      |                                                                 |                                                                  |
| 249 ± 13                             | 192                                                              | 235                                                               |                                      |                                                                 |                                                                  |
| 284.6 ± 4.7                          | 200                                                              | 246                                                               |                                      |                                                                 |                                                                  |



**Table S5.** Brightness Data of the NaYF<sub>4</sub>:20%Yb,2%Er@NaYF<sub>4</sub>:10%Yb@NaYF<sub>4</sub> (Yb@Yb)<sup>is</sup> sample in water, under 978 nm excitation (real, obtained in measurement) and under 976 nm excitation (ideal, calculated) (used in Figure 5B).

| power density<br>/W·cm <sup>-2</sup> | brightness<br>/10 <sup>-17</sup> cm <sup>2</sup> | brightness<br>/10 <sup>-17</sup> cm <sup>2</sup> |
|--------------------------------------|--------------------------------------------------|--------------------------------------------------|
|                                      | 978 nm, real                                     | 976 nm, ideal                                    |
| 4.15 ± 0.36                          | 7.6                                              | 9.3                                              |
| 12.16 ± 0.79                         | 20.7                                             | 25.4                                             |
| 13.9 ± 1.3                           | 26.2                                             | 32                                               |
| 19.0 ± 1.6                           | 35                                               | 43                                               |
| 26.5 ± 2.0                           | 48                                               | 59                                               |
| 31.0 ± 2.2                           | 53                                               | 65                                               |
| 33.1 ± 1.8                           | 50                                               | 62                                               |
| 35.3 ± 2.3                           | 59                                               | 73                                               |
| 40.6 ± 3.1                           | 68                                               | 83                                               |
| 55.8 ± 3.9                           | 89                                               | 109                                              |
| 77.6 ± 4.4                           | 105                                              | 128                                              |
| 90.9 ± 5.1                           | 117                                              | 144                                              |
| 103.8 ± 5.5                          | 124                                              | 152                                              |
| 110.1 ± 8.0                          | 120                                              | 147                                              |
| 151 ± 11                             | 137                                              | 168                                              |
| 210 ± 14                             | 158                                              | 194                                              |
| 246 ± 13                             | 163                                              | 200                                              |
| 280 ± 13                             | 167                                              | 205                                              |

## 9. Calculation of the $\sigma_{Ln}(\lambda_{Ex})$ and the absolute brightness

The particle brightness ( $B_{UC}$ ) of an UC system is defined as the product of the total number of  $\text{Ln}^{3+}$  absorbers per nanoparticle ( $N_{Ln}$ ) times the absorption cross section ( $\sigma_{Ln}(\lambda_{Ex})$  [ $\text{cm}^2$ ]) of one absorbing  $\text{Ln}^{3+}$  ion at the chosen excitation wavelength  $\lambda_{Ex}$  times the absolute quantum yield ( $\Phi_{UC}$ ).

$$B_{UC,Ln}(\lambda_{Ex}) = N_{Ln} \times \sigma_{Ln}(\lambda_{Ex}) \times \Phi_{UC}(P_{Ex}) = \sigma_{UCNP}(\lambda_{Ex}) \times \Phi_{UC}(P_{Ex}) \quad (\text{eq. S1})$$

The particle cross section  $\sigma_{UCNP}$  is controlled by the (average) particle size and (average) number of absorbing  $\text{Ln}^{3+}$  ions and their absorption cross section, which is highly sensitive to the measurement conditions and varies in literature especially for the Nd ion (Table S2). For the determination of  $\sigma_{UCNP}$ , we decided to calculate the ion absorption cross section  $\sigma_{Ln}(\lambda_{Ex})$  first by using a high resolution absorbance spectrum (0.2 nm spectral resolution) of the  $(\text{Yb@Yb,Nd})^{is}$  system (Figure 4A) with known NP concentration  $c$ , and to determine  $N_{Ln}$  subsequently.

Absorption cross section of  $\text{Ln}^{3+}$  ions  $\sigma_{Ln}(\lambda_{Ex})$ :

According to the Beer-Lambert law, the intensity of the incident light  $I_0$  is reduced by passing an absorbing medium with a thickness of  $d$ , with cross section  $\sigma$  and number  $n$  of molecules, as follows:

$$\ln \frac{I_0}{I} = \sigma n d \quad (\text{eq. S2a})$$

The absorbance  $A(\lambda)$  is defined by the decadic molar extinction coefficient  $\varepsilon(\lambda)$ , the NP concentration  $c$  [mol] and the sample thickness  $d$ ,

$$A(\lambda) = \varepsilon(\lambda) c d = \log \frac{I_0}{I} \quad (\text{eq. S2b})$$

By combination of (eq. S2a) and (eq. S2b), we get for  $\sigma_{UCNP}(\lambda_{Ex})$ , with Avogadro's number  $N_A$ ,

$$\sigma_{UCNP}(\lambda) = \frac{1}{\log e} \frac{A(\lambda) 10^3}{N_A c d} \quad (\text{eq. S3})$$

For the brightness calculation of  $(\text{Yb@Yb,Nd})^{is}$  (eq. S1) and (eq. S3) were used. Since  $\sigma_{Ln}(\lambda_{Ex}) = \sigma_{UCNP}(\lambda_{Ex})/N_{Ln}$ , the absorbance cross section per  $\text{Ln}^{3+}$  ion was calculated with  $N_{Ln}$  of  $(\text{Yb@Yb,Nd})^{is}$ , see (Table S6B). The obtained value is listed in Table S2 and was used together with the  $N_{Ln}$  of the Nd-free systems to calculate the  $\sigma_{UCNP}$  and  $B_{UC}$  values of the remaining particles using (eq. 2).

Number of absorbing  $\text{Ln}^{3+}$  ions per NP:

The  $N_{Ln}$  in (eq. S1) was calculated considering the number of ions per hexagonal unit cell ( $N_{unit, Ln}$ ) depending on the doping concentration ( $c_{Ln}$ ) and the calculation of the number of unit cells per NP ( $n_{cells}$ ) using the ratio of NP volume ( $V_{NP}$ ) to unit cell volume ( $V_{cell}$ ) (calculated using a method reported by Mackenzie *et al.*<sup>10</sup>), leading to the numbers presented in Table S6A and S6B.

**Table S6.** The calculated volume values of a hexagonal unit cell, of the core, the shell, and the calculated numbers of unit cells in the core, in the shell, and the number of ions per unit cell are listed for (Yb@Yb,Nd)<sup>is</sup> **(A)**. The number of Yb, Er and Nd ions are given for the 4 particle systems **(B)**.

**A**

| quantity              | value                                               |
|-----------------------|-----------------------------------------------------|
| $V_{cell, hexagonal}$ | $(1.06778 \pm 0.00471) \cdot 10^{-22} \text{ cm}^3$ |
| $V_{NP, core}$        | $(8.0834 \pm 0.584) \cdot 10^{-18} \text{ cm}^3$    |
| $n_{cells, core}$     | $(7.5703 \pm 0.5482) \cdot 10^4$                    |
| $V_{NP, shell1}$      | $(1.02246 \pm 0.14653) \cdot 10^{-17} \text{ cm}^3$ |
| $n_{cells, shell1}$   | $(9.5755 \pm 1.3729) \cdot 10^4$                    |
| $V_{NP, shell2}$      | $(4.72349 \pm 2.87756) \cdot 10^{-18} \text{ cm}^3$ |
| $n_{cells, shell2}$   | $(4.4236 \pm 2.6949) \cdot 10^4$                    |

**B**

| system                   | N <sub>Yb</sub> | N <sub>Nd</sub> |
|--------------------------|-----------------|-----------------|
| (Yb@Yb,Nd) <sup>is</sup> | 37800 ± 2700    | 14100 ± 2000    |
| (Yb@Yb) <sup>is</sup>    | 38300 ± 2800    | -               |
| (Yb) <sup>is2</sup>      | 52100 ± 4200    | -               |
| (Yb) <sup>is5</sup>      | 23400 ± 1700    | -               |

## 10. Calculation of Intensity Change as a Function of Penetration Depth into Water

Since water shows higher absorption coefficient values ( $\alpha_{H_2O}$ ) at 980 nm compared to 808 nm (Figure 4A), with deeper penetration ( $x$ ) of excitation light the effective local power density ( $P_{Ex}$ ) is more strongly decreased for the 980 nm excitation. With lower  $P_{Ex}$  the  $\Phi_{UC}(P_{Ex})$  is also reduced, which leads to a decrease of the luminescence emission signal ( $I_{UC, Ln}$ ). At a certain penetration depth ( $x_C$ ) the previously stronger emission of Yb-excited UCNPs shows the same signal as the Nd-excited systems (crossing point). For  $x > x_C$  the Nd-excitation will lead to a brighter emission in water than Yb-excitation (Figure 6A).

$I_{UC, Ln}$  depends on local  $P_{Ex}$ , the number of  $Ln^{3+}$  absorbers ( $N_{Ln}$ ), the absorption cross section ( $\sigma_{Ln}$ ) and the  $\Phi_{UC}$ :

$$I_{UC, Ln}(x) \approx P_{Ex}(x) \times N_{Ln} \times \sigma_{Ln}(\lambda_{Ex}) \times \Phi_{UC}(P_{Ex}(x)) \quad (\text{eq. S4})$$

In an absorbing medium the passing light – here excitation light and therefore  $P_{Ex}$  – is reduced following the Beer-Lambert law:

$$P_{Ex}(x) \approx P_0 \cdot e^{-\alpha_{H_2O}(\lambda_{Ex}) \cdot x}, \quad (\text{eq. S5})$$

with  $P_0 = P_{Ex}(x=0)$ . With  $N_{Ln} \cdot \sigma_{Ln} \sim A_{Ln}$  it follows:

$$I_{UC, Ln}(x) \approx P_0 \cdot e^{-\alpha_{H_2O}(\lambda_{Ex}) \cdot x} \times A_{Ln} \times \Phi_{UC}(P_{Ex}(x)) \quad (\text{eq. S6})$$

In Figure 6A the penetration depths  $x_C$ , at which the signal intensities for Yb- and Nd-excitation are equal, are determined for both real and ideal excitation at  $P_0 = 50 \text{ W} \cdot \text{cm}^{-2}$ , and in Figure 6B  $x_C$  is plotted for 6 different initial power densities  $P_{Ex}(x=0) = P_0 = 5, 50, 100, 200, 300$  and  $400 \text{ W} \cdot \text{cm}^{-2}$  for both the real and the ideal excitation.  $x_C(P_0)$  is estimated from:

$$I_{UC, Yb}(x_C) = I_{UC, Nd}(x_C) \quad (\text{eq. S7})$$

In Figure S9 the critical penetration depth  $x_C$  varied with Nd doping concentration  $c_{Nd}$  ( $N_{Nd}$ ) was calculated for ideal and real excitation at  $P_0 = 50 \text{ W} \cdot \text{cm}^{-2}$ . Since  $I_{UC, Ln}$  scales linearly with  $N_{Nd}$  the change in  $c_{Nd}$  has a linear effect on  $I_{UC, Nd}$ . The increase in  $I_{UC, Nd}$  with higher  $c_{Nd}$  shifts the crossing point of signal intensities for Yb- and Nd-excitation to lower depths  $x_C$ .

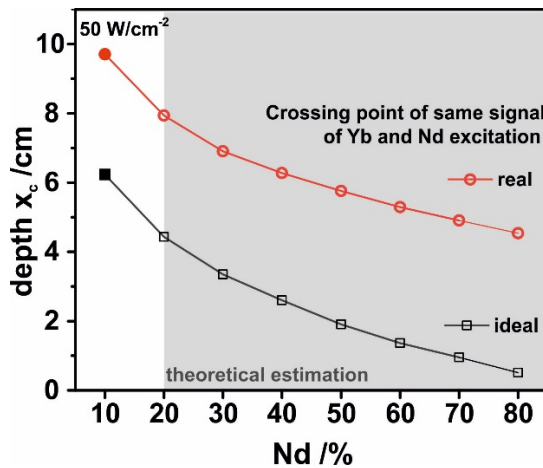

**Figure S9.** Calculation of the penetration depth  $x_C$  in water for a change in  $Nd^{3+}$  doping concentration of  $NaYF_4:20\%Yb,2\%Er@NaYF_4:10\%Yb,10\%Nd@NaYF_4$  ( $(Yb@Yb,Nd)^{15}$ ) varied from 10% up to theoretically 80% at  $50 \text{ W} \cdot \text{cm}^{-2}$ .

For this calculation no influences by cross relaxation due to the shorter ionic distances as well as lattice strain resulting from the different ionic radii of Nd and Y, which could alter the crystal structure and result in defects at the interface, are considered.

## 11. Studies of the Penetration Depth in Phantom Tissue

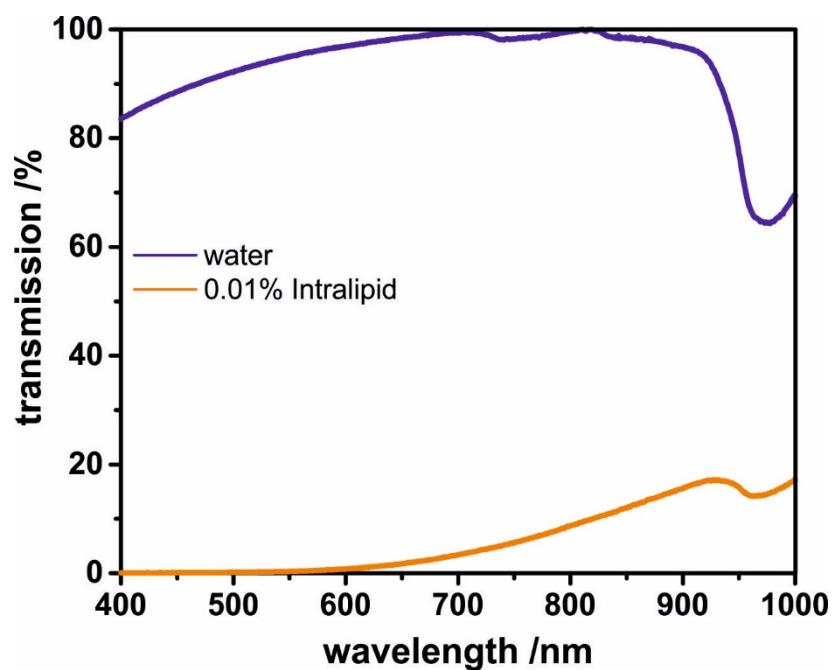

**Figure S10.** Transmission measurements of water and a 0.01% Intralipid emulsion. Due to large scattering of the intralipid emulsion, a 100-times dilution was used compared to the penetration depth measurements.

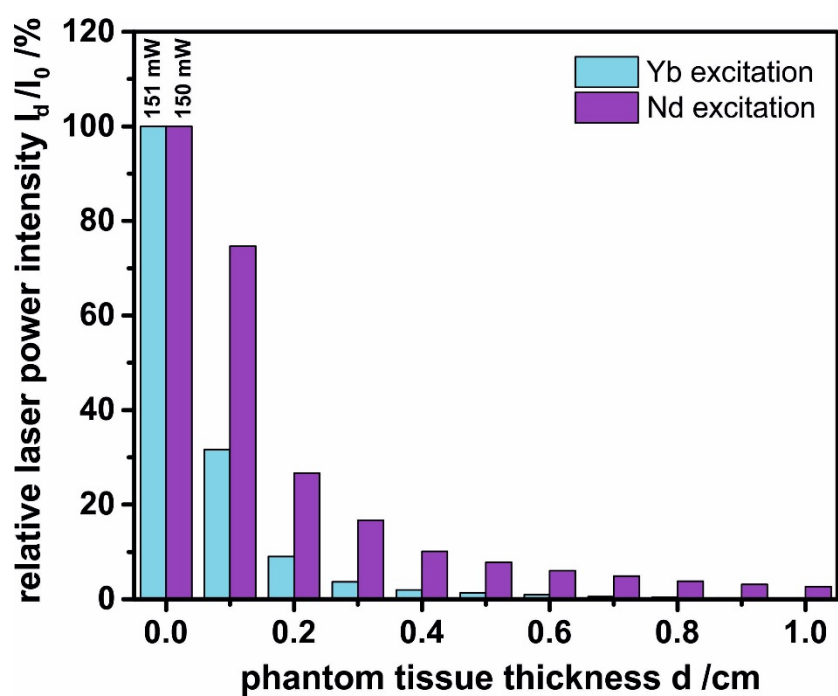

**Figure S11.** Decrease of the 808 nm laser power presented in purple and the 980 nm laser power presented in turquoise when propagating through an intralipid emulsion (1%) with increasing thickness from 0 - 1 cm.

## 12. References

- <sup>1</sup> Wiesholler LM, Genslein C, Schroter A, Hirsch T. Plasmonic enhancement of NIR to UV upconversion by a nanoengineered interface consisting of NaYF<sub>4</sub>:Yb,Tm nanoparticles and a gold nanotriangle array for optical detection of vitamin B12 in serum. *Analytical Chemistry*. 2018 Nov 15;90(24):14247-54.
- <sup>2</sup> Bhutta T, Chardon AM, Shepherd DP, Daran E, Serrano C, Munoz-Yague A. Low phonon energy, Nd: LaF<sub>3</sub> channel waveguide lasers fabricated by molecular beam epitaxy. *IEEE Journal of Quantum Electronics*. 2001 Nov;37(11):1469-77.
- <sup>3</sup> del Rosal B, Pérez-Delgado A, Carrasco E, Jovanović DJ, Dramićanin MD, Dražić G, de la Fuente ÁJ, Sanz-Rodríguez F, Jaque D. Neodymium-based stoichiometric ultrasmall nanoparticles for multifunctional deep-tissue photothermal therapy. *Advanced Optical Materials*. 2016 May;4(5):782-9.
- <sup>4</sup> Estebanez N, Ferrera-González J, Francés-Soriano L, Arenal R, González-Béjar M, Pérez-Prieto J. Breaking the Nd<sup>3+</sup>-sensitized upconversion nanoparticles myth about the need of onion-layered structures. *Nanoscale*. 2018;10(26):12297-301.
- <sup>5</sup> Lupei V, Lupei A, Ikesue A. Transparent Nd and (Nd, Yb)-doped Sc<sub>2</sub>O<sub>3</sub> ceramics as potential new laser materials. *Applied Physics Letters*. 2005 Mar 14;86(11):111118.
- <sup>6</sup> Wang YF, Liu GY, Sun LD, Xiao JW, Zhou JC, Yan CH. Nd<sup>3+</sup>-sensitized upconversion nanophosphors: efficient in vivo bioimaging probes with minimized heating effect. *ACS Nano*. 2013 Jul 23;7(8):7200-6.
- <sup>7</sup> Jaque D, Maestro LM, Del Rosal B, Haro-Gonzalez P, Benayas A, Plaza JL, Rodriguez EM, Sole JG. Nanoparticles for photothermal therapies. *Nanoscale*. 2014;6(16):9494-530.
- <sup>8</sup> del Rosal B, Rocha U, Ximendes EC, Rodríguez EM, Jaque D, Solé JG. Nd<sup>3+</sup> ions in nanomedicine: Perspectives and applications. *Optical Materials*. 2017 Jan 1;63:185-96.
- <sup>9</sup> Lupei V, Lupei A, Gheorghe C, Ikesue A. Sensitized Yb<sup>3+</sup> emission in (Nd, Yb):Y<sub>3</sub>Al<sub>5</sub>O<sub>12</sub> transparent ceramics. *Journal of Applied Physics*. 2010 Dec 15;108(12):123112.
- <sup>10</sup> Mackenzie LE, Goode JA, Vakurov A, Nampi PP, Saha S, Jose G, Millner PA. The theoretical molecular weight of NaYF<sub>4</sub>: RE upconversion nanoparticles. *Scientific Reports*. 2018 Jan 18;8(1):1106.
